# Supplementary material
Source: PubMed Central journal article supplement (PMC11157783)
Supplement: NIHMS1998601-supplement-1.pdf [file NIHMS1998601-supplement-1.pdf]

## Supplementary Material

**Article Title:** Leveraging Natural Language Processing to Improve Electronic Health Record Suicide Risk Prediction for Veterans Health Administration Users

**Authors:** Maxwell Levis, PhD; Joshua Levy, PhD; Kallisse R. Dent, MPH; Vincent Dufort, PhD; Glenn T. Gobbel, PhD, DVM, MS; Bradley V. Watts, MD, MPH; and Brian Shiner, MD, MPH

**DOI Number:** 10.4088/JCP.22m14568

### **LIST OF SUPPLEMENTARY MATERIAL FOR THE ARTICLE**

1. [Table 1](#) REACH-VET Algorithm's 61 Structured Variables
2. [Table 2](#) CountVectorizer Model
3. [Table 3](#) Parameter Tuning
4. [Table 4](#) Standardized Model
5. [Figure 1](#) Checklist for Transparent Model Reporting
6. [Figure 2](#) Methods Overview Diagram
7. [References](#)

### **DISCLAIMER**

This Supplementary Material has been provided by the author(s) as an enhancement to the published article. It has been approved by peer review; however, it has undergone neither editing nor formatting by in-house editorial staff. The material is presented in the manner supplied by the author.

**Supplementary Table 1. REACH-VET algorithm's 61-structured variables<sup>1</sup>**

| <b>Model Factor</b>                                                                         | <b>Weight</b> | <b>Model Factor</b>                                       | <b>Weight</b> |
|---------------------------------------------------------------------------------------------|---------------|-----------------------------------------------------------|---------------|
| <b>Demographics</b>                                                                         |               | <b>Service utilization cont.</b>                          |               |
| Male                                                                                        | 0.456         | Emergency Department visit in last 2 mos.                 | 0.185         |
| >80 yrs. old                                                                                | -0.081        | Psychiatric discharge in last mo.                         | 0.608         |
| White race                                                                                  | 0.584         | Psychiatric discharge in last 6 mo.                       | 0.221         |
| Non-White race                                                                              | -0.118        | Psychiatric discharge in last 12 mo.                      | 0.038         |
| Marriage status                                                                             | -0.202        | Psychiatric discharge in last 24 mo.                      | 0.559         |
| Lives in Western USA                                                                        | 0.206         | Any Mental Health treatment in last 12 mo.                | 0.041         |
| More than 30% Service Connection                                                            | -0.336        | Any Mental Health treatment in last 24 mo.                | 0.002         |
| More than 70% Service Connection                                                            | 0.136         | # days VHA services used in 7th mo. prior                 | -0.006        |
| Interaction Widowed and Male                                                                | -0.109        | # days VHA services used in 13th mo. prior                | 0.000         |
| Interaction between Divorced and Male                                                       | 0.082         | # days Emergency Department in last mo.                   | 0.148         |
| <b>Prior suicide attempts</b>                                                               |               | # days Emergency Department in last 24 mos.               | -0.002        |
| Suicide attempt in last mo.                                                                 | 0.093         | First Use in Prior 5 yrs. was in the Prior yr.            | 0.054         |
| Suicide attempt in last 6 mos.                                                              | 0.462         | # days Inpatient Mental Health in last 7 mos. sq.         | 0.000         |
| Suicide attempt in last 18 mos.                                                             | 0.557         | # days Outpatient services in 7th mo. prior               | -0.006        |
| <b>Diagnoses</b>                                                                            |               | # days Outpatient services in 8th mo. prior               | -0.005        |
| Arthritis dx. in last 12 mos.                                                               | -0.041        | # days Outpatient services in 15th mo. prior              | -0.011        |
| Arthritis dx. in last 24 mos.                                                               | -0.044        | # days Outpatient services in 23rd mo. prior              | -0.001        |
| Lupus dx. in last 24 mos.                                                                   | 0.274         | <b>Medications</b>                                        |               |
| Bipolar dx. in last 24 mos.                                                                 | 0.126         | Alprazolam rx. in last 24 mos.                            | 0.183         |
| Chronic pain dx. in last 24 mos.                                                            | 0.220         | Any anti-depressant rx. in last 24 mos.                   | 0.164         |
| Depression dx. in last 12 mos.                                                              | 0.145         | Any anti-psychotic rx. in last 12 mos.                    | 0.134         |
| Depression dx. in last 24 mos.                                                              | 0.377         | Clonazepam rx. in last 12 mos.                            | 0.114         |
| Diabetes dx. in last 12 mos.                                                                | -0.074        | Clonazepam rx. in last 24 mos.                            | 0.195         |
| Substance use disorder dx. in last 24 mos.                                                  | 0.215         | Lorazepam rx. in last 12 mos.                             | 0.073         |
| Homeless in last 24 mos.                                                                    | -0.120        | Mirtazapine rx. in last 12 mos.                           | 0.009         |
| Head/neck cancer dx. in last 12 mos.                                                        | 0.159         | Mirtazapine rx. in last 24 mos.                           | 0.050         |
| Head/neck cancer dx. in last 24 mos.                                                        | 0.024         | Mood stabilizer rx. in last 12 mos.                       | 0.018         |
| Anxiety disorder dx. in last 24 mos.                                                        | 0.041         | Opioids rx. in last 12 mos.                               | 0.018         |
| Personality disorder dx. in last 24 mos.                                                    | 0.002         | Sedative or anxiolytic rx. in last 12 mos.                | 0.251         |
| Interaction Other anxiety disorder (prior 24 mos.) and Personality disorder (prior 24 mos.) | 0.086         | Zolpidem rx. in last 12 mos. Zolpidem rx. in last 12 mos. | 0.021         |
| <b>Service utilization</b>                                                                  |               | Sedative or anxiolytic rx. in last 24 mos.                | 0.349         |
| Emergency Department visit in last 1 mo.                                                    | 0.125         | Statin rx. in last 12 mos.                                | -0.141        |

**Supplementary Table 2.** CountVectorizer model

Table presents CountVectorizer<sup>2</sup> output analyzed by Random Forest (RF)<sup>3</sup> and Naïve Bayes (NB)<sup>4</sup> classification models. Each model evaluates notes from different time intervals back from date of death by suicide for cases or matched time points for controls. Overall predictive accuracy is estimated via AUC. Risk concentration for Veterans with the highest predicted risk (10%, 5%, 1%, .1%) is also estimated. Following REACH-VET studies, to evaluate risk concentration, we gauged the proportion of death by suicide to the expected proportion of death by suicide assuming uniform sample distribution, i.e., among Veterans Health Administration patients who scored within the highest 10% of this model, 22% died by suicide. As Countvectorizer models were typically less predictive than TFIDF models, they were not included in additional analyses.

| Days back  | RF                        | Risk concentration at the following risk tiers: |            |            |            | NB                        | Risk concentration at the following risk tiers: |            |            |            |
|------------|---------------------------|-------------------------------------------------|------------|------------|------------|---------------------------|-------------------------------------------------|------------|------------|------------|
|            | AUC (95% CI)              | Top 10%                                         | Top 5%     | Top 1%     | Top .1%    | AUC (95% CI)              | Top 10%                                         | Top 5%     | Top 1%     | Top .1%    |
| <b>30</b>  | <b>.66</b><br>(.63 - .68) | <b>2.2</b>                                      | <b>2.4</b> | <b>3.0</b> | <b>4.2</b> | <b>.61</b><br>(.58 - .63) | <b>1.4</b>                                      | <b>1.4</b> | <b>1.7</b> | <b>1.2</b> |
| <b>90</b>  | <b>.63</b><br>(.60 - .65) | <b>1.8</b>                                      | <b>1.9</b> | <b>2.0</b> | <b>2.7</b> | <b>.61</b><br>(.58 - .63) | <b>1.4</b>                                      | <b>1.2</b> | <b>1.5</b> | <b>1.0</b> |
| <b>360</b> | <b>.61</b><br>(.59 - .62) | <b>1.5</b>                                      | <b>1.1</b> | <b>1.4</b> | <b>1.0</b> | <b>.60</b><br>(.58 - .62) | <b>1.4</b>                                      | <b>1.2</b> | <b>1.6</b> | <b>1.0</b> |

### Supplementary Table 3. Parameter tuning

We performed coarse hyperparameter searches to identify ideal Random Forest (RF),<sup>22</sup> XGBoost (XG),<sup>23</sup> and Logistic Regression (LR)<sup>26</sup> model specifications for TFIDF<sup>5</sup> output. Optimal hyperparameters were evaluated based on the loss over each validation set. As follows, we list the hyperparameters scanned for each model through the coarse inspection of validation set statistics. Naïve Bayes models were not subject to cross validations. Final selections were based on sensible recommendations and experimentation.

| Hyperparameter tuning for TFIDF (utilized hyperparameters are marked in bold) |                                                                                                                                                                                                                                                                                                              |
|-------------------------------------------------------------------------------|--------------------------------------------------------------------------------------------------------------------------------------------------------------------------------------------------------------------------------------------------------------------------------------------------------------|
| RF                                                                            | $n\_estimators = 200, \mathbf{300}, 500, 700, 1000$ ; $max\_features = \mathbf{auto}$ , sqrt; $max\_depth = 5, 10, 25, 50, \mathbf{none}$ ; $min\_samples\_split = \mathbf{2}, 5, 10$ ; $min\_samples\_leaf = 1, 2, \mathbf{10}$ ; $bootstrap = \mathbf{true}, false$                                        |
| XG                                                                            | $n\_estimators = 200, \mathbf{500}, 700, 1000$ ; $subsample = .5, \mathbf{.8}, 1$ ; $num\_boost\_round = 2, 10, \mathbf{50}$ ; $min\_child\_weight = 1, 6, \mathbf{12}$ ; $max\_depth = \mathbf{5}, 10, 25, 50$ ; $early\_stopping\_rounds = 1, 10, \mathbf{100}$ ; $colsample\_bytree = .6, \mathbf{.8}, 1$ |
| LR                                                                            | $C = .001, .01, .1, \mathbf{1}, 10, 100$ ; L1, <b>L2</b>                                                                                                                                                                                                                                                     |

**Supplementary Table 4.** Standardized model

Table presents TFIDF<sup>5</sup> output that was standardized using StandardScaler<sup>6</sup> and then analyzed using Random Forest (RF)<sup>3</sup> and Naïve Bayes (NB)<sup>4</sup> classification models. Each model evaluates notes from different time intervals back from date of death by suicide for cases or matched time points for controls. Overall predictive accuracy is estimated via AUC. Risk concentration for Veterans with the highest predicted risk (10%, 5%, 1%, .1%) is also estimated. Following REACH-VET studies, to evaluate risk concentration, we gauged the proportion of death by suicide to the expected proportion of death by suicide assuming uniform sample distribution, i.e., among Veterans Health Administration patients who scored within the highest 10% of this model, 22% died by suicide. As models that had been standardized were typically less predictive than unstandardized models, they were not included in additional analyses.

| Days back  | RF                        | Risk concentration at the following risk tiers: |            |            |            | NB                        | Risk concentration at the following risk tiers: |            |            |            |
|------------|---------------------------|-------------------------------------------------|------------|------------|------------|---------------------------|-------------------------------------------------|------------|------------|------------|
|            | AUC (95% CI)              | Top 10%                                         | Top 5%     | Top 1%     | Top .1%    | AUC (95% CI)              | Top 10%                                         | Top 5%     | Top 1%     | Top .1%    |
| <b>30</b>  | <b>.65</b><br>(.63 - .68) | <b>2.2</b>                                      | <b>2.5</b> | <b>2.7</b> | <b>4.0</b> | <b>.62</b><br>(.60 - .64) | <b>1.4</b>                                      | <b>1.4</b> | <b>1.6</b> | <b>1.0</b> |
| <b>90</b>  | <b>.63</b><br>(.61 - .65) | <b>1.6</b>                                      | <b>1.9</b> | <b>2.1</b> | <b>2.4</b> | <b>.62</b><br>(.60 -.64)  | <b>1.5</b>                                      | <b>1.2</b> | <b>1.4</b> | <b>1.0</b> |
| <b>360</b> | <b>.60</b><br>(.58 - .62) | <b>1.5</b>                                      | <b>1.1</b> | <b>1.3</b> | <b>1.0</b> | <b>.61</b><br>(.58 -.63)  | <b>1.4</b>                                      | <b>1.5</b> | <b>1.9</b> | <b>2.0</b> |

# Supplementary Figure 1. Checklist for transparent model reporting

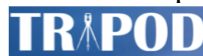

TRIPOD Checklist: Prediction Model Development

| Section/Topic                | Item | Checklist Item                                                                                                                                                                                        | Page      |
|------------------------------|------|-------------------------------------------------------------------------------------------------------------------------------------------------------------------------------------------------------|-----------|
| <b>Title and abstract</b>    |      |                                                                                                                                                                                                       |           |
| Title                        | 1    | Identify the study as developing and/or validating a multivariable prediction model, the target population, and the outcome to be predicted.                                                          | 1         |
| Abstract                     | 2    | Provide a summary of objectives, study design, setting, participants, sample size, predictors, outcome, statistical analysis, results, and conclusions.                                               | 2         |
| <b>Introduction</b>          |      |                                                                                                                                                                                                       |           |
| Background and objectives    | 3a   | Explain the medical context (including whether diagnostic or prognostic) and rationale for developing or validating the multivariable prediction model, including references to existing models.      | 3         |
|                              | 3b   | Specify the objectives, including whether the study describes the development or validation of the model or both.                                                                                     | 4         |
| <b>Methods</b>               |      |                                                                                                                                                                                                       |           |
| Source of data               | 4a   | Describe the study design or source of data (e.g., randomized trial, cohort, or registry data), separately for the development and validation data sets, if applicable.                               | 4         |
|                              | 4b   | Specify the key study dates, including start of accrual; end of accrual; and, if applicable, end of follow-up.                                                                                        | 4         |
| Participants                 | 5a   | Specify key elements of the study setting (e.g., primary care, secondary care, general population) including number and location of centres.                                                          | 4         |
|                              | 5b   | Describe eligibility criteria for participants.                                                                                                                                                       | 5         |
|                              | 5c   | Give details of treatments received, if relevant.                                                                                                                                                     |           |
| Outcome                      | 6a   | Clearly define the outcome that is predicted by the prediction model, including how and when assessed.                                                                                                | 8         |
|                              | 6b   | Report any actions to blind assessment of the outcome to be predicted.                                                                                                                                |           |
| Predictors                   | 7a   | Clearly define all predictors used in developing or validating the multivariable prediction model, including how and when they were measured.                                                         | 9         |
|                              | 7b   | Report any actions to blind assessment of predictors for the outcome and other predictors.                                                                                                            | 9         |
| Sample size                  | 8    | Explain how the study size was arrived at.                                                                                                                                                            | 5         |
| Missing data                 | 9    | Describe how missing data were handled (e.g., complete-case analysis, single imputation, multiple imputation) with details of any imputation method.                                                  | 5         |
| Statistical analysis methods | 10a  | Describe how predictors were handled in the analyses.                                                                                                                                                 | 7         |
|                              | 10b  | Specify type of model, all model-building procedures (including any predictor selection), and method for internal validation.                                                                         | 7         |
|                              | 10d  | Specify all measures used to assess model performance and, if relevant, to compare multiple models.                                                                                                   | 8         |
| Risk groups                  | 11   | Provide details on how risk groups were created, if done.                                                                                                                                             | 8         |
| <b>Results</b>               |      |                                                                                                                                                                                                       |           |
| Participants                 | 13a  | Describe the flow of participants through the study, including the number of participants with and without the outcome and, if applicable, a summary of the follow-up time. A diagram may be helpful. | 10/<br>22 |
|                              | 13b  | Describe the characteristics of the participants (basic demographics, clinical features, available predictors), including the number of participants with missing data for predictors and outcome.    | 10/<br>21 |
| Model development            | 14a  | Specify the number of participants and outcome events in each analysis.                                                                                                                               | 22        |
|                              | 14b  | If done, report the unadjusted association between each candidate predictor and outcome.                                                                                                              |           |
| Model specification          | 15a  | Present the full prediction model to allow predictions for individuals (i.e., all regression coefficients, and model intercept or baseline survival at a given time point).                           | 23        |
|                              | 15b  | Explain how to use the prediction model.                                                                                                                                                              | 10        |
| Model performance            | 16   | Report performance measures (with CIs) for the prediction model.                                                                                                                                      | 23        |
| <b>Discussion</b>            |      |                                                                                                                                                                                                       |           |
| Limitations                  | 18   | Discuss any limitations of the study (such as nonrepresentative sample, few events per predictor, missing data).                                                                                      | 13        |
| Interpretation               | 19b  | Give an overall interpretation of the results, considering objectives, limitations, and results from similar studies, and other relevant evidence.                                                    | 11        |
| Implications                 | 20   | Discuss the potential clinical use of the model and implications for future research.                                                                                                                 | 14        |
| <b>Other information</b>     |      |                                                                                                                                                                                                       |           |
| Supplementary information    | 21   | Provide information about the availability of supplementary resources, such as study protocol, Web calculator, and data sets.                                                                         | 25/<br>26 |
| Funding                      | 22   | Give the source of funding and the role of the funders for the present study.                                                                                                                         | 1         |

We recommend using the TRIPOD Checklist in conjunction with the TRIPOD Explanation and Elaboration document.

Supplementary Figure 2. Methods overview diagram

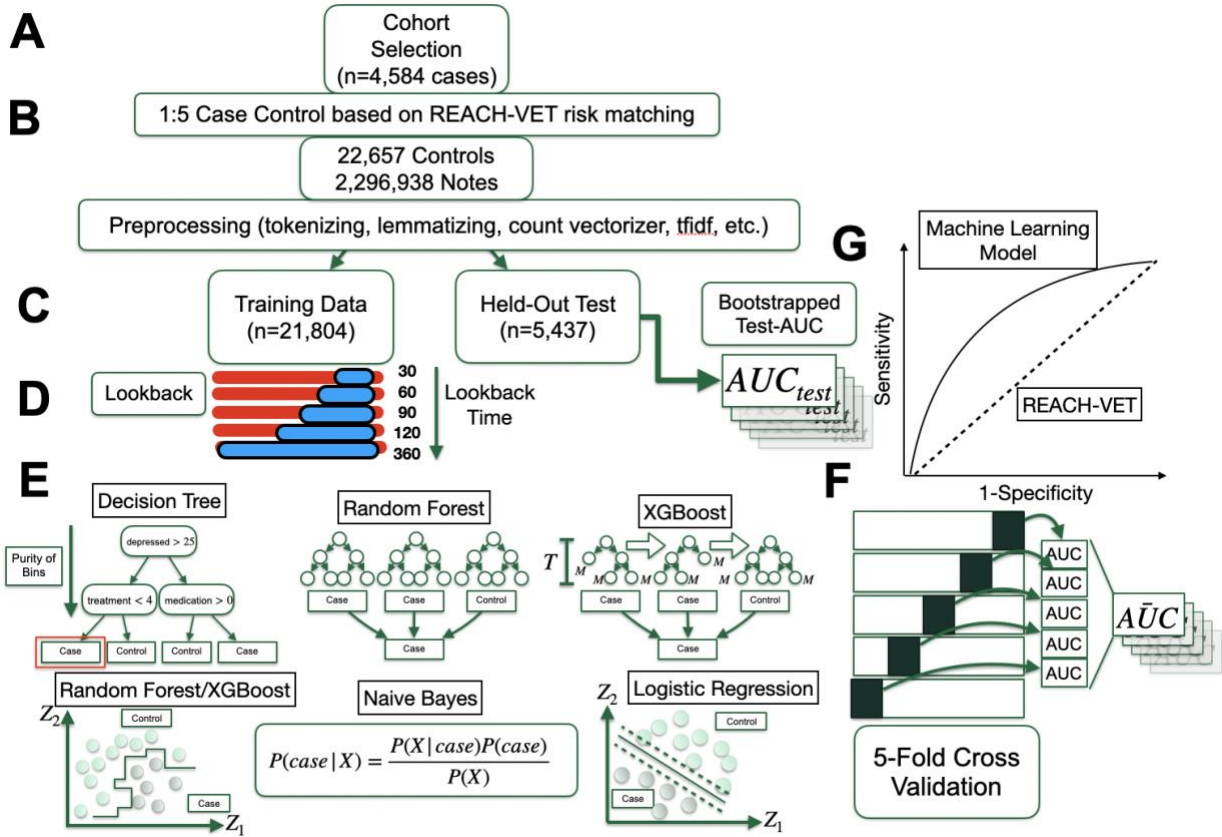

1. VA. REACH VET, Predictive Analytics for Suicide Prevention. 2017. Available from: <https://www.dspo.mil/Portals/113/Documents/2017%20Conference/Presentations/REACH%20VET%20Predictive%20Modeling.pdf?ver=2017-08-10-132615-843>
2. Weinberger K, Dasgupta A, Attenberg J, Langford J, Smola A. Feature Hashing for Large Scale Multitask Learning. 2009; Available from: <https://arxiv.org/abs/0902.2206>
3. Ho TK. Random decision forests. In: Proceedings of 3rd international conference on document analysis and recognition. 1995. p. 278–82.
4. Zhang H. Exploring conditions for the optimality of Naïve Bayes. *Int J Pattern Recognit Artif Intell.* 2005 Mar;19(02):183–98.
5. Salton G, Buckley C. Term-weighting approaches in automatic text retrieval. *Inf Process Manag.* 1988 Jan;24(5):513–23.
6. Buitinck L, Louppe G, Blondel M, Pedregosa F, Mueller A, Grisel O, et al. API design for machine learning software: experiences from the scikit-learn project. 2013; Available from: <https://arxiv.org/abs/1309.0238>
